# Supplementary material for: Right to a Fair Trial and the Criminal Process
Source: Hindawi journal article supplement (doi:10.1155/2012/826182), 2011-01-01

A

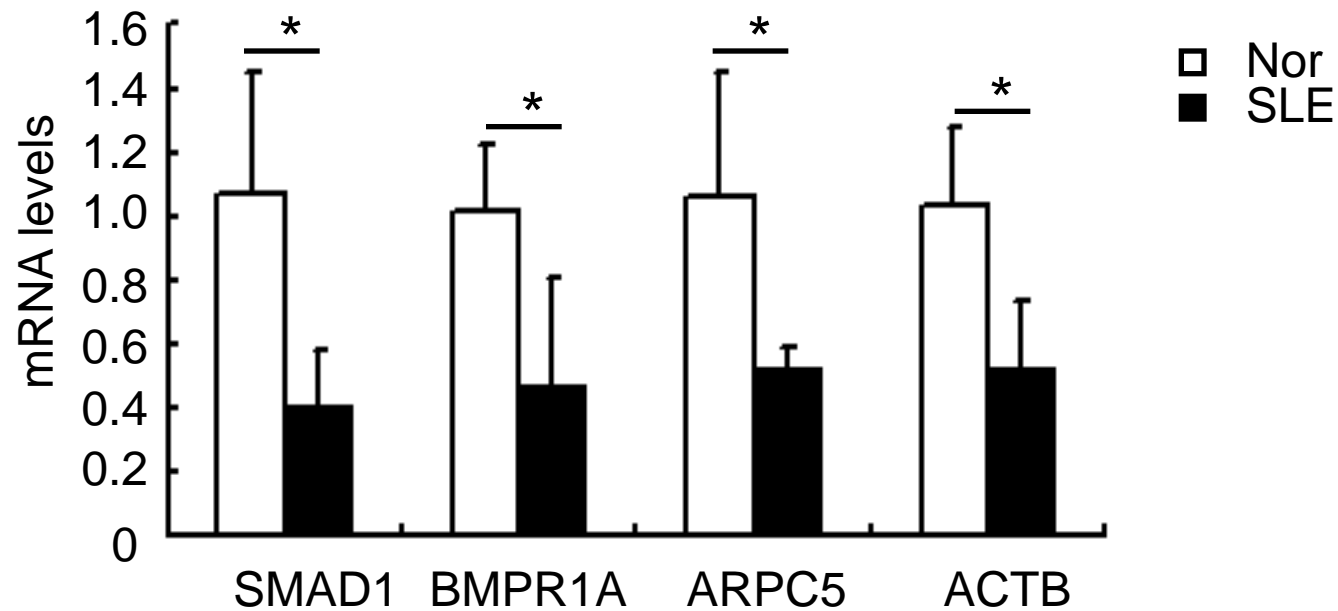

B

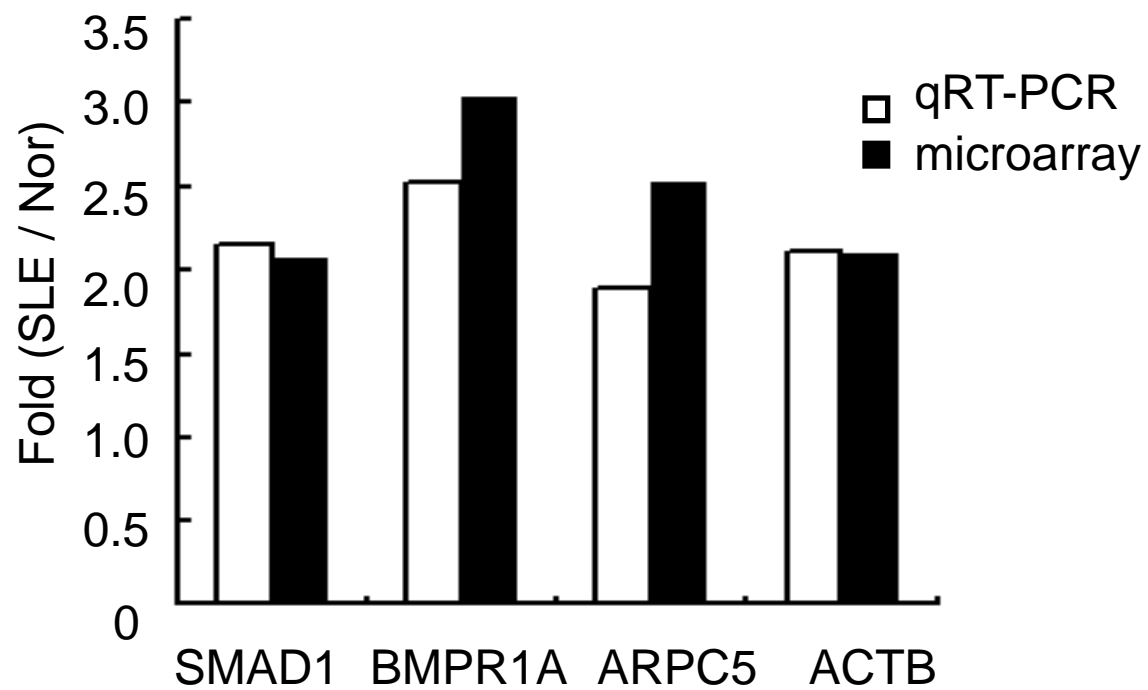

Supplement: f1 [file 826182.f1.pdf]
