# Supplementary material for: Right to a Fair Trial and the Criminal Process
Source: Hindawi journal article supplement (doi:10.1155/2012/826182), 2011-01-01

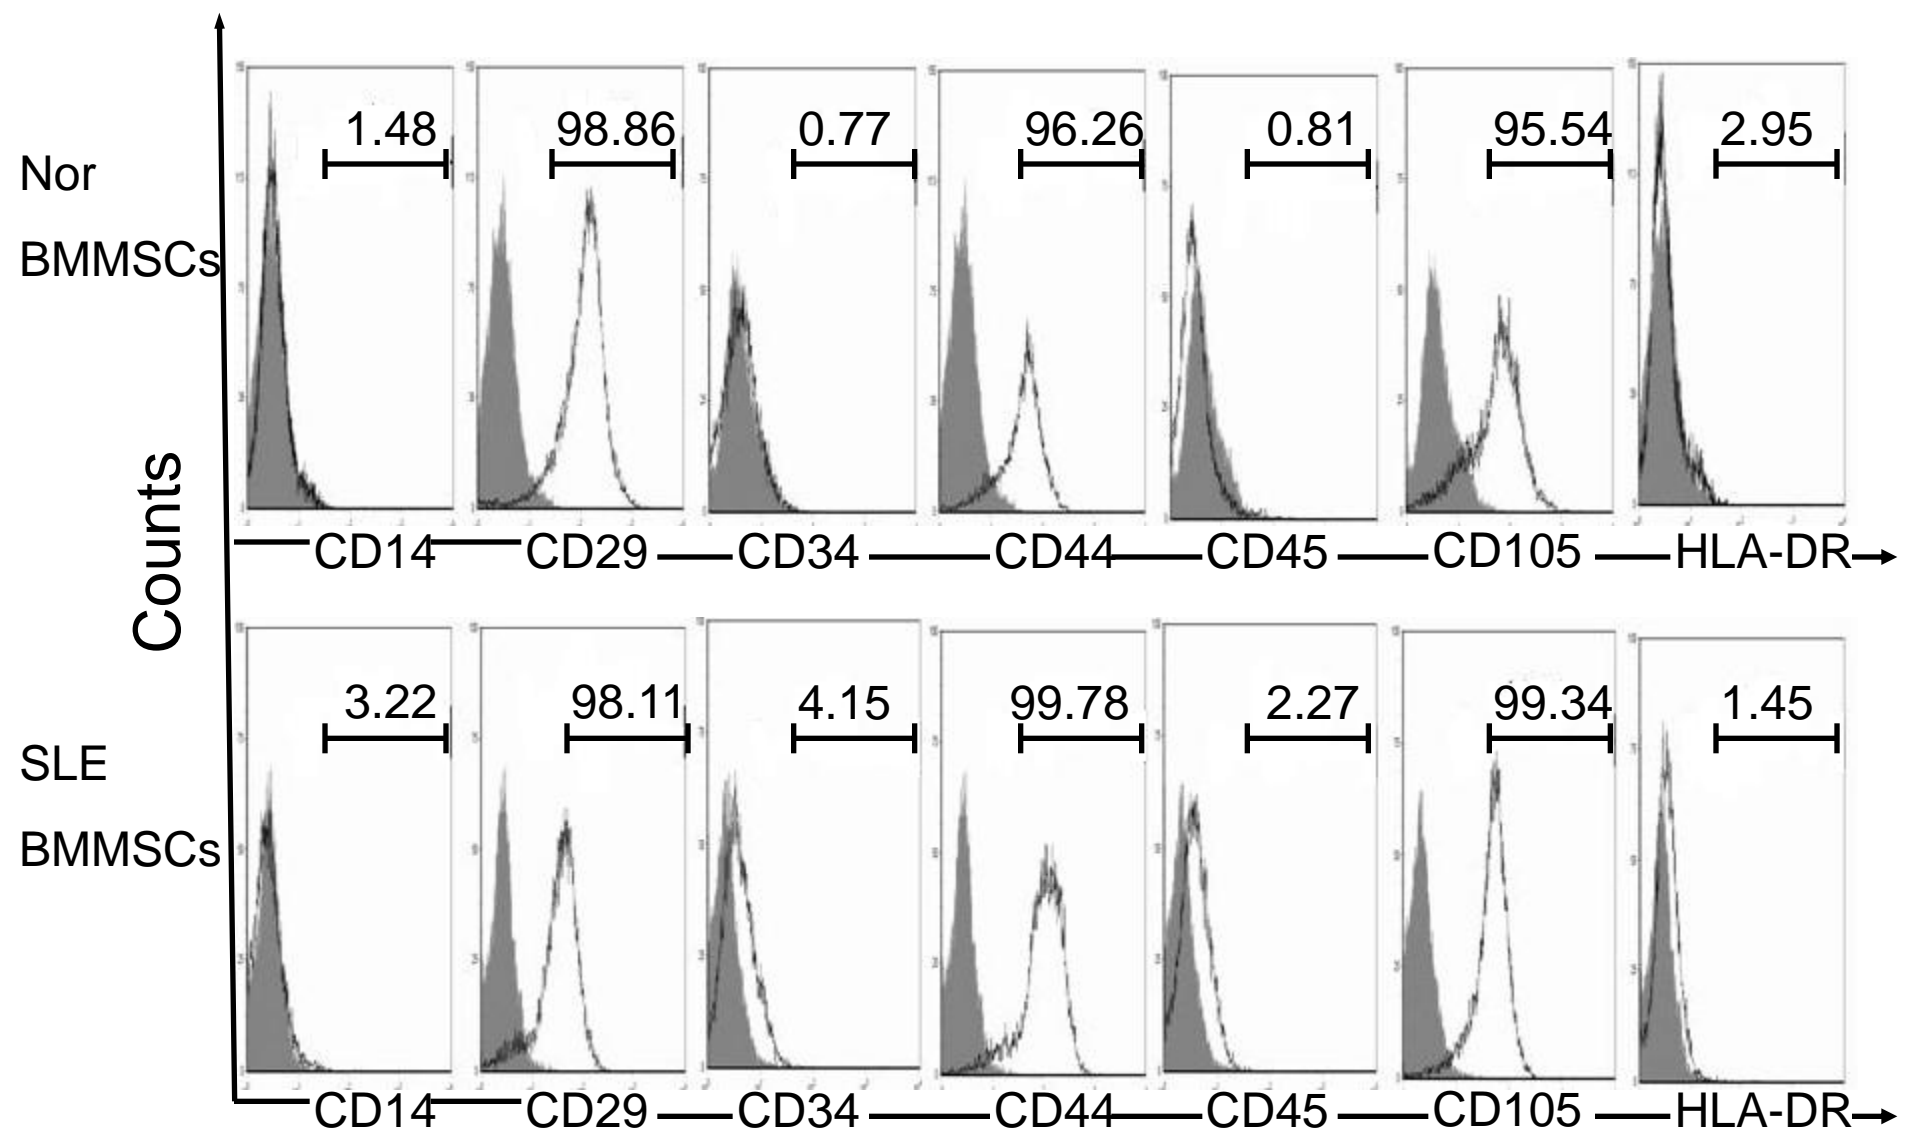

Supplement: f2 [file 826182.f2.pdf]
